# Supplementary material
Source: PubMed Central journal article supplement (PMC7934078)
Supplement: jamaotolaryngolheadnecksurg-e210011-s001.pdf [file jamaotolaryngolheadnecksurg-e210011-s001.pdf]

1 **Stanford University**  
2 **Trial Protocol (IRB-33096)**

3  
4 **Protocol Title**  
5 The role of steroids in the perioperative management of patients with chronic rhinosinusitis: a  
6 trial protocol.

7  
8 **Principal Investigator**  
9 Peter H. Hwang, MD

10  
11 **Co-Investigators**  
12 Michael T. Chang MD, Julia Noel MD, Zhen Jason Qian MD, Sachi Dholakia BS, Noel F.  
13 Ayoub MD MBA, Jayakar V. Nayak MD PhD, Zara M. Patel MD  
14  
15

16 **ABSTRACT**

17

18 **Importance:** While oral corticosteroids are commonly prescribed following endoscopic sinus  
19 surgery (ESS) for chronic rhinosinusitis, there is little data to suggest that this is a beneficial  
20 practice.

21

22 **Objective:** To assess the efficacy of oral corticosteroids following ESS in chronic rhinosinusitis  
23 without nasal polyposis (CRSsNP).

24

25 **Design:** Prospective double-blinded, placebo-controlled, randomized clinical trial

26

27 **Setting:** Academic tertiary rhinology practice

28

29 **Participants:** Adults with CRSsNP undergoing ESS.

30

31 **Interventions:** Patients will be randomized into two treatment groups: a 12-day postoperative  
32 taper of oral prednisone versus placebo. All study patients will also receive the a 2-week  
33 postoperative regimen of oral antibiotics, fluticasone spray, and saline rinses.

34

35 **Main Outcomes and Measures:** The primary outcome measures will be the Sinonasal Outcome  
36 Test 22 (SNOT-22) scores and Lund-Kennedy endoscopy scores, which will be collected  
37 preoperatively and postoperatively at 1 week, 6 weeks, 3 months, and 6 months. Scores will be  
38 compared between treatment groups at each time point using t-tests. Longitudinal difference  
39 between treatment groups was analyzed using two-way, repeated measures ANOVAs. Secondary  
40 outcome measures were side effects of corticosteroids.

41

42 **Trial Registration:**

43 Registry name: [clinicaltrials.gov](https://clinicaltrials.gov)

44 Trial ID: NCT02748070

45 URL: [clinicaltrials.gov](https://clinicaltrials.gov)

46

47 **1. PURPOSE**

48

49 **A. In layperson's language state the purpose of the study in 3-5 sentences.**

50

51 After patients with chronic rhinosinusitis (CRS) undergo sinus surgery, they are typically  
52 instructed to take oral steroids for several days to weeks. However, there is limited data to  
53 suggest this is a beneficial practice, and oral steroids have been shown to have significant and  
54 unpleasant side effects. This study will investigate whether there is truly evidence based utility  
55 to the use of steroids after sinus surgery.

56

57 **B. State what the Investigator(s) hope to learn from the study. Include an assessment of the  
58 importance of this new knowledge.**

59

60 Chronic rhinosinusitis is a disease that affects an estimated 13% of the adult population. Patients  
61 with this disease suffer from reduced quality of life, impaired sleep, fatigue, acute infections, and  
62 chronic pain. Healthcare expenditures for CRS are estimated at \$8.6 billion annually, with the  
63 majority of costs arising from repetitive physician visits, emergency department encounters, and  
64 medications. Despite its prevalence, relatively little is understood about optimal medical therapy  
65 in the post-operative period. As described above, oral steroids are routinely prescribed after sinus  
66 surgery based on anecdotal data and expert opinion rather than convincing, randomized  
67 controlled data.

68

69 The aim of conducting this study, therefore, is to determine if oral steroids have a role in the  
70 peri-operative treatment of patients with CRS. This study would contribute a wealth of important  
71 data to the field of Rhinology and the management of CRS. The role of steroids in the peri-  
72 operative period would be further elucidated, providing randomized controlled data with which  
73 providers may make informed therapeutic decisions. In summary, the results of this study have  
74 significant potential to influence current practice and management guidelines.

75

76 **C. Explain why human subjects must be used for this project. (i.e. purpose of study is to  
77 test efficacy of investigational device in individuals with specific condition; purpose of  
78 study is to examine specific behavioral traits in humans in classroom or other environment)**

79

80 The purpose of the study is to test the efficacy of a medication in individuals with CRS, which is  
81 not a disease known to be accurately duplicated in any other model.

82

83 **2. STUDY PROCEDURES**

84

85 **A. Please summarize the research procedures, screening through closeout, which the  
86 human subject will undergo. Refer to sections in the protocol attached in section 16, BUT  
87 do not copy the clinical protocol. Be clear on what is to be done for research and what is  
88 part of standard of care.**

89

90 Screening: Patients who have been recommended to undergo endoscopic sinus surgery by our  
91 department will be recruited for the study and informed of its purpose pre-operatively. SNOT-  
92 22 scores (a quality of life survey well established in Rhinology) and Lund-Kennedy

93 endoscopic exam scores (an quantitative clinical assessment of disease severity) will be recorded  
94 in their medical records. This is the same protocol performed for all patients seen in our clinic  
95 regardless of their enrollment in the study.

96  
97 Randomization and Treatment Groups: The patients that wish to participate will be randomized  
98 into two treatment arms by our nurse practitioner based on a random number generator. They  
99 will receive one of the following post-operative regimens:

- 100  
101 1) oral steroid (treatment) + steroid spray (treatment)  
102 2) oral placebo (control) + steroid spray (treatment)

103  
104 These medications will be manufactured and packaged by an independent compounding  
105 pharmacy, and prescribed by our nurse practitioner at the pre-operative visit. Patients will begin  
106 their therapy on the first post-operative day. All oral steroid regimens will be given in our  
107 institution's standard 12 days taper, while topical steroids will be delivered via a metered dose  
108 nasal spray bottle for two weeks. All study patients will receive identical peri-operative antibiotic  
109 therapy. We do not anticipate these medications to be an inconvenience to study patients as all  
110 proposed interventions are not different from routine post-operative care. In addition, patients  
111 undergoing surgery will have already trialed these medications as part of their pre-operative  
112 medical therapy.

113  
114 Surgery: Routine endoscopic sinus surgery will be performed per our institution's standard  
115 protocol. In this step there will be no difference in treatment from those patients not enrolled in  
116 the study.

117  
118 Post-Operative Care: At this point, patients will begin therapies according to the treatment arm to  
119 which they have been randomized. Study patients will attend post-operative appointments at  
120 identical time points to non-study patients. These will take place at the following intervals:

- 121 Post-operative visit 1: 1-2 weeks  
122 Post-operative visit 2: 6-8 weeks  
123 Post-operative visit 3: 3 months  
124 Post-operative visit 4: 6 months

125  
126 Experimental therapy will finish after 2 weeks. At this visit, all patients will then be maintained  
127 on intranasal steroid spray and nasal saline irrigations, which is the commonly employed  
128 therapeutic standard. Thereafter, patients will, per standard protocol, be followed on an  
129 observational basis depending on the severity of symptoms and response to treatment. At each  
130 visit, as is done for all individuals, SNOT-22 and Lund-Kennedy endoscopic exam scores will be  
131 repeated and recorded.

132  
133 Statistical analyses will be performed using Stata 15 (Stata Statistical Software: Release 15;  
134 StataCorp LP, College Station, Texas). SNOT-22 and Lund-Kennedy endoscopic scores will be  
135 compared between prednisone and non-prednisone groups at each time point using t-tests.  
136 Longitudinal data will be analyzed using two-way, repeated measures ANOVAs; the within-  
137 subjects factor (Time) will be used to report changes in performance over time for the overall  
138 cohort, while the between-subjects factor (Group) will be used to report difference between

139 prednisone and non-prednisone groups over time. The Greenhouse-Geisser correction will be  
140 used when sphericity violations is indicated by Mauchly's test. Significance will be determined  
141 by  $p < 0.05$ .

142

143 **B. Explain how the above research procedures are the least risky that can be performed**  
144 **consistent with sound research design.**

145

146 This study does not seek to evaluate a novel research procedure. Rather, we endeavor to  
147 determine if a procedure already in place nearly universally is, in fact, beneficial, as there is a  
148 distinct lack of evidence of suggest so. Overall, we are investigating a procedural method that  
149 will have fewer side effects than the currently accepted practice.

150

151 **C. State if deception will be used. If so, provide the rationale and describe debriefing**  
152 **procedures. Since you will not be fully informing the participant in your consent process**  
153 **and form, complete an alteration of consent (in section 13). Submit a debriefing script (in**  
154 **section 16).**

155

156 N/A

157

158 **D. State if audio or video recording will occur. Describe what will become of the recording**  
159 **after use, e.g., shown at scientific meetings, erased. Describe the final disposition of the**  
160 **recordings.**

161

162 N/A

163

164 **E. Describe alternative procedures or courses of treatment, if any, that might be**  
165 **advantageous to the participant. Describe potential risks and benefits associated with these.**  
166 **Any standard treatment that is being withheld must be disclosed in the consent process and**  
167 **form. (i.e. standard-of-care drug, different interventional procedure, no procedure or**  
168 **treatment, palliative care, other research studies).**

169

170 All reasonable alternatives are included as a treatment arm in this study. There is no standard of  
171 care that is being withheld from patients in any group.

172

173 **F. Will it be possible to continue the more (most) appropriate therapy for the participant(s)**  
174 **after the conclusion of the study?**

175

176 Yes, patients will stop all experimental therapies at the 2 week mark. They will then be placed on  
177 the typical post-operative regimen, which includes a nasal steroid spray and twice daily saline  
178 irrigations. They will continue to be followed in our clinic after the 4 week mark, and their  
179 therapies tailored to their current symptoms and the endoscopic appearance of the nasal cavity.

180

181 **G. Study Endpoint. What are the guidelines or end points by which you can evaluate the**  
182 **different treatments (i.e. study drug, device, procedure) during the study? If one proves to**  
183 **be clearly more effective than another (or others) during the course of a study, will the**

184 **study be terminated before the projected total participant population has been enrolled?**  
185 **When will the study end if no important differences are detected?**  
186

187 Currently, our post-operative protocol dictates that patients will be seen in clinic at 1 week, 3  
188 weeks, and 6 weeks after surgery. We will only slightly alter this timeline for study patients. At  
189 the 2 week appointment, all experimental therapies will be completed. Patients will then be  
190 started on intranasal steroid sprays and saline irrigations so as not to deviate for an extended  
191 period from currently accepted practices. We will use the final scheduled appointment at 4 weeks  
192 after surgery as the official end point for comparison of treatment arms.

193  
194 Additionally, outcomes evaluated will be the symptom questionnaire and the endoscopic exam  
195 score at each visit. If, during the course of follow up, one regimen proves to be clearly superior  
196 to another, the study will be terminated and patients will receive the optimal therapy. By power  
197 analysis, we require 70 patients to achieve statistical significance. If there is a clearly optimal  
198 therapy determined in these first 70 patients, we will end our research at that time. All patients  
199 will continue to be followed beyond 4 weeks depending on symptom severity and response to  
200 treatment.

### 201 202 **3. BACKGROUND**

#### 203 204 **A. Describe past experimental and/or clinical findings leading to the formulation of the** 205 **study.** 206

207 Currently, the preferred treatment regimen for patients with chronic rhinosinusitis (CRS) with  
208 and without polyps after endoscopic sinus surgery involves a non-standardized combination of  
209 oral steroids and antibiotics. The European Position Paper on Rhinosinusitis and Nasal Polyps  
210 offers guidelines for surgeons in the appropriate therapies to improve patient symptoms based on  
211 data available in the literature to date. The use of oral steroids in CRS is associated with level IV  
212 evidence and a category C recommendation, indicating a lack of randomized controlled data to  
213 support its use (1). Therefore, this almost universal current practice is perpetuated by anecdotal  
214 data and expert opinion. Furthermore, systemic steroids are associated with known significant  
215 side effects and potential drug interactions. These may be severe and include but are not limited  
216 to high blood pressure, hyperglycemia and diabetes, adrenal suppression, weight gain, glaucoma,  
217 osteoporosis, fluid retention, gastrointestinal bleeding, ulcers, and mood changes (2). Thus, oral  
218 steroids potentially pose a significant risk, have unproven benefit, and are not appropriate for  
219 repeated or long-term use – an unfortunate obstacle in treating a chronic disease. Recently,  
220 steroids dissolved in a saline irrigant have been increasingly used and proven to be effective in  
221 the routine management of CRS. Furthermore, several studies have suggested the utility and safe  
222 side effect profile of these medications; however, the data supporting their use as a peri-operative  
223 treatment is distinctly lacking.

224  
225 While the data to support the utility of topical steroids in the treatment of CRS is evident,  
226 relatively few groups have explored topical steroid irrigations specifically as a peri-operative  
227 intervention. Fandino et al conducted a meta-analysis of 13 randomized clinical trails and  
228 cohort studies examining the use of topical steroids delivered via drops, sprays, nebulizers, or  
229 irrigations for patients with CRS with nasal polyps who had previously undergone endoscopic

230 sinus surgery. According to his analysis, intra-nasal corticosteroids had a significant beneficial  
231 effect on symptom scores and a reduction in polyp scores.  
232 Additionally, the use of INCS decreased the rate of polyp recurrence, and did not alter  
233 adrenocorticotrophic hormones post-intervention, suggesting the intra-nasal delivery method to  
234 carry less risk than the oral version (3). Snidvongs et al conducted a study with 111 patients and  
235 reported significant improvement in symptom scores and endoscopy scores over those who did  
236 not receive post-operative topical steroids (4). Jang et al retrospectively evaluated 60 patients  
237 post-surgically who were treated with topical steroid deliveries and showed a significant  
238 decrease in quality of life and endoscopy scores after patients stopped their treatments (5).

239  
240 In summary, the data supporting the use of steroids in patients with CRS immediately after  
241 endoscopic sinus surgery is sparse. We, therefore, seek to more definitively elucidate the role  
242 and utility of steroid treatment in the peri-operative period. Furthermore, per our review of the  
243 literature, there has been no direct comparison of the traditional oral regimen to topical  
244 therapy (nasal spray). Could these be proven equally effective, topically delivered steroids may  
245 be considered as a replacement for systemic steroids. This would represent a significant shift and  
246 improvement in the current post-operative management of CRS. Patients would avoid the  
247 innumerable side effects of oral steroids, which are detailed above. Furthermore, while oral  
248 steroid usage is often limited by unwanted side effects, a topical regimen may be sustained  
249 over a prolonged period as a maintenance therapy if symptoms necessitate.

250  
251 **State the following: (i) the number of participants expected to be enrolled at Stanford-**  
252 **affiliated site(s); (ii) the total number of participants expected to enroll at all sites; (iii) the**  
253 **type of participants (i.e. students, patients with certain cancer, patients with certain cardiac**  
254 **condition) and the reasons for using such participants.**

255  
256 Based on a current rate of 12-15 endoscopic sinus surgeries weekly, as well as allowing for a  
257 significant percentage of patients who do not desire to participate in the study, we anticipate  
258 between 80 and 100 patients to enroll. The study will be conducted only at Stanford Hospitals  
259 and Clinics. Participants will be those with CRS with and without polyps who have been  
260 recommended and consented for endoscopic sinus surgery. These participants will be used  
261 because they suffer from the specific disease for which we endeavor to research alternative  
262 therapies.

263  
264 **B. Describe any animal experimentation and findings leading to the formulation of the**  
265 **study.**

266  
267 None.

268  
269 **4. RADIOISOTOPES OR RADIATION MACHINES**

270  
271 N/A

272  
273 **5. DEVICES**

274  
275 N/A

276  
277  
278  
279  
280  
281  
282  
283  
284  
285  
286

## 6. DRUGS, REAGENTS, OR CHEMICALS

**A. Please list in the table below all investigational drugs, reagents, or chemicals to be administered to participants.**

N/A

**B. Please list in the table below all commercial drugs, reagents, or chemicals to be administered to participants.**

| Drug Name  | Source   | IND Regulations | Manufacturer              | Dosage    |
|------------|----------|-----------------|---------------------------|-----------|
| Prednisone | Pharmacy | Yes             | West-Ward Pharmaceuticals | 10-40mg   |
| Flonase    | Pharmacy | Yes             | GlaxoSmithKline           | 50ug/dose |

287  
288  
289  
290  
291

## 7. MEDICAL EQUIPMENT FOR HUMAN SUBJECTS AND LABORATORY ANIMALS

N/A

292  
293  
294

## 8. PARTICIPANT POPULATION

295  
296  
297  
298  
299

**A. State the following: (i) the number of participants expected to be enrolled at Stanford-affiliated site(s); (ii) the total number of participants expected to enroll at all sites; (iii) the type of participants (i.e. students, patients with certain cancer, patients with certain cardiac condition) and the reasons for using such participants.**

300  
301  
302  
303  
304  
305  
306  
307

Based on a current rate of 12-15 endoscopic sinus surgeries weekly, as well as allowing for a significant percentage of patients who do not desire to participate in the study, we anticipate between 80 and 100 patients to enroll. The study will be conducted only at Stanford Hospitals and Clinics. Participants will be those with CRS with and without polyps who have been recommended and consented for endoscopic sinus surgery. These participants will be used because they suffer from the specific disease for which we endeavor to research alternative therapies.

308  
309

**B. State the age range, gender, and ethnic background of the participant population being recruited.**

310  
311  
312  
313

We will recruit patients >18 that are able to provide consent. There will be no gender or ethnic exclusions.

314  
315  
316  
317

**C. State the number and rationale for involvement of potentially vulnerable subjects in the study (including children, pregnant women, economically and educationally disadvantaged, decisionally impaired, homeless people, employees and students). Specify the measures being taken to minimize the risks and the chance of harm to the potentially vulnerable**



318 **subjects and the additional safeguards that have been included in the protocol to protect**  
319 **their rights and welfare.**

320  
321 N/A

322  
323 **D. If women, minorities, or children are not included, a clear compelling rationale must be**  
324 **provided (e.g., disease does not occur in children, drug or device would interfere with**  
325 **normal growth and development, etc.).**

326  
327 Children will not be included in this study as it is not typical for endoscopic sinus surgery to be  
328 performed in this population. It is rare for them to develop the extent of disease that would  
329 require surgical intervention, and surgery, in fact, is often avoided as the sinuses have not fully  
330 developed in the pediatric population. Furthermore, they are unable to provide their own  
331 informed consent to participate in this trial.

332  
333 **E. State the number, if any, of participants who are laboratory personnel, employees,**  
334 **and/or students. They should render the same written informed consent. If payment is**  
335 **allowed, they should also receive it. Please see Stanford University policy.**

336  
337 N/A

338  
339 **F. State the number, if any, of participants who are healthy volunteers. Provide rationale**  
340 **for the inclusion of healthy volunteers in this study. Specify any risks to which participants**  
341 **may possibly be exposed. Specify the measures being taken to minimize the risks and the**  
342 **chance of harm to the volunteers and the additional safeguards that have been included in**  
343 **the protocol to protect their rights and welfare.**

344  
345 N/A

346  
347 **G. How will you identify and recruit potential participants about the research study? (E.g.,**  
348 **by: chart review; notified by treating physician; response to ad). All final or revised**  
349 **recruitment materials, flyers, etc. must be submitted to the IRB for review and approval**  
350 **before use. You may not contact potential participants prior to IRB approval. See**  
351 **Advertisements: Appropriate Language for Recruitment Material.**

352  
353 Recruitment will be invitation only from the patient population seen in our Rhinology clinics.  
354 Patients will first be evaluated by our providers. If, based on that evaluation, endoscopic sinus  
355 surgery is recommended to them and they meet inclusion criteria, they will then be informed of  
356 the study and its purpose and importance. After this has been discussed, patients will be invited  
357 to participate if they so choose. Our nurse practitioner performs all study introductions and  
358 obtains consent. If there are any questions, Rhinology providers are always available for  
359 consultation. We do not intend to advertise to nor recruit within the general public. There will be  
360 no recruitment materials.

361  
362 **H. Inclusion and Exclusion Criteria.**

363

364 Inclusion criteria:

365 Age > 18

366 Able to provide informed consent

367 Chronic rhinosinusitis without nasal polyposis based on published diagnostic criteria

368 Patients undergoing endoscopic sinus surgery

369

370 Exclusion criteria:

371 Age <18

372 Aspirin exacerbated respiratory disease (also known as Samter's triad)

373 Allergic fungal sinusitis

374 Cystic fibrosis

375 Immunosuppression

376 Chronic steroid use

377 Steroid use within 30 days prior to surgery

378

379 **I. Describe your screening procedures, including how qualifying laboratory values will be**  
380 **obtained. If you are collecting personal health information prior to enrollment (e.g.,**  
381 **telephone screening), please request a waiver of authorization for recruitment (in section**  
382 **15).**

383

384 Screening will be performed during clinic visits. First, it must be determined if a patient is a  
385 surgical candidate, which is a decision based on establishing the diagnosis of chronic  
386 rhinosinusitis by published diagnostic criteria. Furthermore, patients with this diagnosis must  
387 have failed maximum medical therapy. At the pre-operative appointment, a complete routine  
388 history will be taken as is standard in our clinics. This will include information regarding past  
389 medical history, past surgical history, current medications, social history, family history, and  
390 allergies. This information is readily available to us as a part of the electronic medical record.  
391 Patients must also confirm accuracy by filling out a questionnaire prior to their first encounter.  
392 No qualifying laboratory values are necessary.

393

394 **J. Describe how you will be cognizant of other protocols in which participants might be**  
395 **enrolled. Please explain if participants will be enrolled in more than one study.**

396

397 We do not anticipate that participants will be enrolled in more than one study. However, we will  
398 be sure to inquire before enrolling patients if they are actively participating in another study. If  
399 so, and our interventions may interfere in any way, we will not continue with the enrollment  
400 process. We do not anticipate difficulty in recruiting the required number of patients, and,  
401 therefore, will defer to studies in which patients are already enrolled.

402

403 **K. Payment/reimbursement. Explain the amount and schedule of payment or**  
404 **reimbursement, if any, that will be paid for participation in the study. Substantiate that**  
405 **proposed payments are reasonable and commensurate with the expected contributions of**  
406 **participants and that they do not constitute undue pressure on participants to volunteer for**  
407 **the research study. Include provisions for prorating payment. See payment considerations**

408

409 N/A

410  
411  
412  
413  
414  
415  
416  
417  
418  
419  
420  
421  
422  
423  
424  
425  
426  
427  
428  
429  
430  
431  
432  
433  
434  
435  
436  
437  
438  
439  
440  
441  
442  
443  
444  
445  
446  
447  
448  
449  
450  
451  
452  
453  
454

**L. Costs. Please explain any costs that will be charged to the participant.**

The participant will accrue identical costs to any patient being evaluated and treated for chronic rhinosinusitis, which will vary tremendously based on insurance policies. During the process, costs that may accumulate include: clinic appointments, prescribed medications, surgical intervention, specialty evaluation. No additional costs will be charged based on participation in this study.

**M. Estimate the probable duration of the entire study. Also estimate the total time per participant for: (i) screening of participant; (ii) active participation in study; (iii) analysis of participant data.**

The study duration is anticipated to be 12-24 months. Time allotted for screening of the participant will depend heavily on the time that elapses between the initial patient encounter in clinic and the date for which surgery is scheduled. This may require 1-6 months, and occasionally longer. Active study participation will begin at the surgical date and end at the 4th post-operative visit. Organization and analysis of the data will require 2-4 weeks.

**9. RISKS**

**A. For the following categories include a scientific estimate of the frequency, severity, and reversibility of potential risks. Wherever possible, include statistical incidence of complications and the mortality rate of proposed procedures. Where there has been insufficient time to accumulate significant data on risk, a statement to this effect should be included. (In describing these risks in the consent form to the subject, it is helpful to use comparisons which are meaningful to persons unfamiliar with medical terminology.)**

**i. The risks of the Investigational devices.**

N/A

**ii. The risks of the Investigational drugs. Information about risks can often be found in the Investigator's brochure.**

N/A

**iii. The risks of the Commercially available drugs, reagents or chemicals. Information about risks can often be found in the package insert.**

Oral Prednisone: The side effects of short courses of systemic steroids (<3 weeks) include stomach upset, weight gain, insomnia, hyperglycemia, hypokalemia, adrenal suppression, and mood changes. These can occur in up to 16% of patients, with stomach upset being the most common. These effects are all reversible after stopping the steroid.

455 Topical Fluticasone: The side effects of topical steroids include dry throat, sore throat, nasal  
456 irritation, headache, nose bleeds. These are the more common side effects, the incidence of  
457 which is unknown. Rare and serious side effects include difficulty breathing, flu symptoms, and  
458 vision changes. Again, these typically improve after stopping the steroids. On very rare occasion,  
459 vision symptoms may be permanent.

460

461 None of these interventions differ from those already being instituted by our staff.

462

463 **iv. The risks of the Procedures to be performed. Include all investigational, non-**  
464 **investigational and non-invasive procedures (e.g., surgery, blood draws, treadmill tests).**

465

466 See the risks of the commercially available drugs - None of these interventions differ from those  
467 already being instituted by our staff.

468

469 **v. The risks of the Radioisotopes/radiation-producing machines (e.g., X-rays, CT scans,**  
470 **fluoroscopy) and associated risks.**

471

472 N/A

473

474 **vi. The risks of the Physical well-being.**

475

476 N/A

477

478 **vii. The risks of the Psychological well-being.**

479

480 N/A

481

482 **viii. The risks of the Economic well-being.**

483

484 N/A

485

486 **ix. The risks of the Social well-being.**

487

488 N/A

489

490 **x. Overall evaluation of Risk.**

491 X Low - innocuous procedures such as phlebotomy, urine or stool collection, no therapeutic  
492 agent, or safe therapeutic agent such as the use of an FDA approved drug or device.

493 Medium - therapy with chemotherapy, antibodies, or a non-FDA approved potentially  
494 toxic drug, invasive procedures such some organ biopsies or catheter procedures, and  
495 some studies using biological agents

496 High - some organ biopsies, novel therapeutic procedures, first-time-in-humans drug or  
497 device studies, some biological agents or Recombinant DNA Vector studies

498

499

500 **B. If you are conducting international research, describe the qualifications/preparations**  
501 **that enable you to both estimate and minimize risks to participants. Provide an explanation**  
502 **as to why the research must be completed at this location and complete the International**  
503 **Research Form. If not applicable, enter N/A.**

504  
505 N/A

506  
507 **C. Describe the planned procedures for protecting against and minimizing all potential**  
508 **risks. Include the means for monitoring to detect hazards to the participant (and/or to a**  
509 **potential fetus if applicable). Include steps to minimize risks to the confidentiality of**  
510 **identifiable information.**

511  
512 Medication administration will be monitored during the post-operative visits. Patients will begin  
513 their assigned therapy the day after surgery, and then will be seen 1, 2, and 4 weeks post-  
514 operatively. Any side effects being encountered will be discussed at these visits, and specialty  
515 services available in a timely manner to address them if needed. Furthermore, patients have 24  
516 hour access to a physician in the department, and are, at any time, able to call with questions or  
517 concerns regarding their treatment.

518  
519 Identifiable patient information will be handled per institutional protocol. Unique login  
520 information is required for all persons wishing to access the electronic medical system. All  
521 communications with patient data are sent on a secured machine via an encrypted service that is  
522 password protected.

523  
524 **D. Explain the point at which the experiment will terminate. If appropriate, include the**  
525 **standards for the termination of the participation of the individual participant Also discuss**  
526 **plans for ensuring necessary medical or professional intervention in the event of adverse**  
527 **effects to the participants.**

528  
529 The study will officially terminate for each patient after the 4th post-operative visit.

530  
531 If a patient is experiencing an adverse outcome from surgery or from post-operative therapy,  
532 their participation in the study will be terminated early in the interest of well-being. In this event,  
533 patients will be promptly seen in subspecialty clinics (or by inpatient consultants if the patient is  
534 admitted to the hospital) that may assist in managing these complications. Additionally, if a  
535 patient is having an emergency, they are able to contact one of our house staff 24 hrs per day for  
536 advice. As a last resort, our Emergency Department is available for expedited work up of major  
537 events.

538  
539 Finally, if it becomes clear after the first 70 patients have completed their interventional therapy  
540 that one therapy arm is drastically superior to others, and that patients are thus not receiving  
541 optimal care, the study will be terminated and therapies altered.

542  
543  
544 **E. Data Safety and Monitoring Plan (DSMP). See guidance on Data Safety and Monitoring.**  
545 **A Data and Safety Monitoring Plan (DSMP) is required for studies that present Medium or**

546 **High risk to participants. (See Overall Evaluation of Risk above). If Low Risk, a DSMP**  
547 **may not be necessary. Multi-site Phase III clinical trials funded by NIH require the DSM**  
548 **Plan to have a Data Safety Monitoring Board or Committee (DSMC or DSMB). The FDA**  
549 **recommends that all multi-site clinical trials that involve interventions that have potential**  
550 **for greater than minimal risk to study participants also have a DSMB or DSMC. The role**  
551 **of the DSMC or DSMB is to ensure the safety of participants by analyzing pooled data**  
552 **from all sites, and to oversee the validity and integrity of the data. Depending on the degree**  
553 **of risk and the complexity of the protocol, monitoring may be performed by an**  
554 **independent committee, a board (DSMC/DSMB), a sponsor's Data Safety Committee**  
555 **(DSC), a Medical Monitor, a sponsor's safety officer, or by the Protocol Director (PD).**  
556 **Describe the following:**

557  
558 **1. What type of data and/or events will be reviewed under the monitoring plan, e.g. adverse**  
559 **events, protocol deviations, aggregate data?**

560  
561 Aggregate Data Analysis Reports  
562 Progress toward study endpoints  
563 AEs, SAEs, SUSARs

564  
565 **2. Identify who will be responsible for Data and Safety Monitoring for this study, e.g.**  
566 **Stanford Cancer Institute DSMC, an independent monitoring committee, the sponsor,**  
567 **Stanford investigators independent of the study, the PD, or other person(s).**

568  
569 The Protocol Director will be responsible for Data and Safety Monitoring.

570  
571 **3. Provide the scope and composition of the monitoring board, committee, or safety**  
572 **monitor, e.g., information about each member's relevant experience or area of expertise. If**  
573 **the Monitor is the Stanford Cancer Center DSMC or the PD, enter N/A.**

574  
575 N/A

576  
577 **4. Confirm that you will report Serious Adverse Events (SAEs), Suspected Unexpected**  
578 **Serious Adverse Reactions (SUSARs), or Unanticipated Problems (UPs) to the person or**  
579 **committee monitoring the study in accordance with Sponsor requirements and FDA**  
580 **regulations.**

581  
582 All SAEs, SUSARs, and UPs will be reported in a timely manner in accordance with Sponsor  
583 requirements and FDA regulations.

584  
585 **5. If applicable, how frequently will the Monitoring Committee meet? Will the Monitoring**  
586 **Committee provide written recommendations about continuing the study to the Sponsor**  
587 **and IRB?**

588  
589 N/A

590

591 **6. Specify triggers or stopping rules that will dictate when the study will end, or when some**  
592 **action is required. If you specified this in Section 2g [Study Endpoints], earlier in this**  
593 **application enter 'See 2g'.**

594  
595 See 2g

596  
597 **7. Indicate to whom the data and safety monitoring person, board, or committee will**  
598 **disseminate the outcome of the review(s), e.g., to the IRB, the study sponsor, the**  
599 **investigator, or other officials, as appropriate.**

600  
601 Any AEs, SAEs, and UPs will be reported to the IRB, study sponsor and principal investigator.  
602 When appropriate, these will also be reported to our Risk Management group.

## 603 604 **10. BENEFITS**

605  
606 **A. Describe the potential benefit(s) to be gained by the participants or by the acquisition of**  
607 **important knowledge which may benefit future participants, etc.**

608  
609 The current standard of care in the management of CRS patients with and without nasal  
610 polyposis after endoscopic sinus surgery involves a non-standardized regimen of antibiotics  
611 and systemic steroids. However, the use of oral steroids in this period is based on anecdotal  
612 evidence and expert opinion (level IV evidence). Given the known risks of oral steroid  
613 use, it is important to definitively establish their utility and to investigate alternatives. Our  
614 study first seeks to more clearly define the role of steroids, both oral and topical, in the peri-  
615 operative setting. Furthermore, we intend to establish topical steroids as a safer but equally  
616 effective therapy. This information will be invaluable to the field and practice of Rhinology.  
617 There is a great need for additional investigation to determine whether steroids truly have a  
618 beneficial role in post-operative CRS patients. We endeavor to provide randomized, controlled  
619 data on which clinicians may base their therapeutic decisions. In addition, the introduction of  
620 topical steroids into routine post-operative care would fundamentally change current clinical  
621 practices, and may even influence future guidelines. For patients, this may transform their  
622 post-operative care into one that is more easily tolerated with less detrimental effects on  
623 health.

## 624 625 **11. PRIVACY AND CONFIDENTIALITY**

626  
627 **A. Describe how the conditions under which interactions will occur are adequate to protect**  
628 **the privacy interests of participants (e.g., privacy of physical setting for interviews or data**  
629 **collection, protections for follow-up interactions such as telephone, email and mail**  
630 **communications).**

631  
632 All interactions with patients will take place in a private clinical setting, which is no different  
633 from our current practice. Data collection will also be performed at this time based on the  
634 physical exam as well as a questionnaire the patient will be asked to complete in privacy while  
635 alone in the exam room. Any telephone communication will be available only via our secure  
636 electronic medical record. All e-mail will be done using electronic devices that are password

637 protected, backed up, and encrypted with institution specific software.

638

639 **B. Specify PHI (Protected Health Information). PHI is health information linked to HIPAA**  
640 **identifiers (see above). List BOTH health information AND HIPAA identifiers. If you are**  
641 **using STARR , use the Data Privacy Attestation to ensure that your request will match**  
642 **your IRB-approved protocol. Be consistent with information entered in section 15a.**

643

644 As during a routine medical appointment, the following will be obtained:

645 Name, medical record number, birthday, gender, medical history, surgical history, allergies,  
646 social history, family history.

647

648 **C. You are required to comply with University Policy that states that ALL electronic**  
649 **devices: computers (laptops and desktops; OFFICE or HOME); smart phones; tablets;**  
650 **external hard disks, USB drives, etc. that may hold identifiable participant data will be**  
651 **password protected, backed up, and encrypted. See <http://med.stanford.edu/datasecurity/>**  
652 **for more information on the Data Security Policy and links to encrypt your devices.**  
653 **Provide any additional information on ALL data security measures you are taking. You**  
654 **must use secure databases such as RedCap. If you are unsure of the security of the system,**  
655 **check with your Department IT representative.**

656

657 No additional security measures. As stated above, all patient information will be viewed only on  
658 university provided desktops or on personal computers with institution security software  
659 installed, meaning these machines are password protected, backed up, and encrypted. Any  
660 transmissions will be done via secure, encrypted e-mail with password protected access.

661

662 **D. Describe how data or specimens will be labeled (e.g. name, medical record number,**  
663 **study number, linked coding system) or de-identified. If you are de-identifying data or**  
664 **specimens, who will be responsible for the de-identification? If x-rays or other digital**  
665 **images are used, explain how and by whom the images will be de-identified.**

666

667 Patient data will be labeled with an assigned numerical study code via Excel spreadsheet. This  
668 data file will be stored on our Stanford departmental server, which requires unique password  
669 log in via Stanford laptops and desktops only. The coding system file will be stored on the  
670 Study Director's Stanford issued computer which is also password protected and in a different  
671 location than the data file. There will not be de-identification of data.

672

673 **E. Indicate who will have access to the data or specimens (e.g., research team, sponsors,**  
674 **consultants) and describe levels of access control (e.g., restricted access for certain persons**  
675 **or groups, access to linked data or specimens).**

676

677 The research team and our statistical consultant will have access to this data. Full viewing and  
678 access will be granted to the immediate research team (the Protocol Director and Academic  
679 Sponsor) so they may contribute to it as patients are seen in clinic. The statistical consultant  
680 will have read only access. All data will be managed and transmitted on secure, university  
681 provided and protected machines via secure e-mail that encrypts via Stanford specific security  
682 software.



683  
684  
685  
686  
687  
688  
689  
690  
691  
692  
693  
694  
695  
696  
697  
698  
699  
700  
701  
702  
703  
704  
705  
706  
707  
708  
709  
710  
711  
712  
713  
714  
715  
716  
717  
718  
719  
720  
721  
722  
723  
724  
725  
726  
727  
728

**F. If data or specimens will be coded, describe the method in which they will be coded so that study participants' identities cannot be readily ascertained from the code.**

Coding will be done via Excel. Each patient will be assigned a random numerical value with storage of the data file and coding file as above.

**G. If data or specimens will be coded, indicate who will maintain the key to the code and describe how it will be protected against unauthorized access.**

The Protocol Director will maintain the key to the code. The code will be contained in a separate, password protected file with an inconspicuous title. This file will exist only on the Protocol Director's Stanford issued computer, which is University compliant and password protected.

**H. If you will be sharing data with others, describe how data will be transferred (e.g., courier, mail) or transmitted (e.g., file transfer software, file sharing, email). If transmitted via electronic networks, describe how you will secure the data while in transit.**

Data will be shared only among the members of the research team and the statistical consultant. Transmission will be done via e-mail, including only the medical record number as identifiable patient information. All e-mails will be sent on a secured computer as an encrypted attachment that is password protected. The subject line will not refer to the content of the e-mail. Consent will be obtained from patients to use e-mail as a mode of data sharing. There will be no paper records of this data.

**I. How will you educate research staff to ensure they take appropriate measures to protect the privacy of participants and the confidentiality of data or specimens collected (e.g. conscious of oral and written communications, conducting insurance billing, and maintaining paper and electronic data)?**

Thankfully our staff conduct many research trials and are very familiar with patient privacy protection. However, before beginning this trial we will review the HIPAA privacy guidelines for the collection and distribution of protected health information. Research staff will be reminded to access PHI only on protected computers, to log out off computers when finished, utilize private space when discussing patient or experimental data, not create any paper records that may be mistakenly left for public viewing, and to transmit data only via secure, encrypted e-mail. Finally, all involved staff will undergo their annual HIPAA renewal training in the spring of each year.

**12. POTENTIAL CONFLICT OF INTEREST**

All investigators declare no financial interests related to this protocol.

**13. CONSENT BACKGROUND**

729 See attached consent form.

730

731 **14. ASSENT BACKGROUND (LESS THAN 18 YEARS OF AGE)**

732

733 N/A

734

735 **15. HIPAA BACKGROUND**

736

737 Consent form contains embedded HIPAA language.

738

739

740 **REFERENCES**

- 741
- 742 1. Fokkens WJ, Lund VJ, Mullol J, et al. European position paper on rhinosinusitis and nasal  
743 polyps 2012. *Rhinol Suppl.* 2012;23:1–298
- 744
- 745 2. Cain, Rachel B, and Devyani Lal. “Update on the Management of Chronic Rhinosinusitis.”  
746 *Infection and Drug Resistance* 6 (2013): 1–14. PMC. Web. 5 Jan. 2015.
- 747
- 748 3. Fandiño C, Marcela et al. “The Use of Postoperative Topical Corticosteroids in Chronic  
749 Rhinosinusitis with Nasal Polyps: A Systematic Review and Meta-Analysis.” *American Journal*  
750 *of Rhinology & Allergy* 27.5 (2013): e146–e157. PMC. Web. 5 Jan. 2015.
- 751
- 752 4. Snidvongs K, Pratt E, Chin D, et al. Corticosteroid nasal irrigations after endoscopic sinus  
753 surgery in the management of chronic rhinosinusitis. *Int Forum Allergy Rhinol* 2:415–421, 2012.
- 754
- 755 5. Jang DW, Lachanas VA, Segel J, Kountakis SE. Budesonide nasal irrigations in the  
756 postoperative management of chronic rhinosinusitis. *Int Forum Allergy Rhinol.* 2013  
757 Sep;3(9):708-11..
- 758
- 759 6. Rudmik L, Hoy M, Schlosser RJ, et al. Topical therapies in the management of chronic  
760 rhinosinusitis: an evidence-based review with recommendations. *Int Forum Allergy Rhinol.*  
761 Epub October 8, 2012.
- 762
- 763 7. Bhalla RK, Payton K, Wright ED. Safety of budesonide in saline sinonasal irrigations in the  
764 management of chronic rhinosinusitis with polyposis: lack of significant adrenal suppression. *J*  
765 *Otolaryngol Head Neck Surg* 2008;37:821–825.
- 766
- 767 8. Welch KC, Thaler ER, Doghramji LL, Palmer JN, Chiu AG. The effects of serum and urinary  
768 cortisol levels of topical intranasal irrigations with budesonide added to saline in patients with  
769 recurrent polyposis after endoscopic sinus surgery. *Am J Rhinol Allergy* 2010;24:26–28.
- 770
- 771 9. Seiberling KA, Chang DF, Nyirady J, Park F, Church CA. Effect of intranasal budesonide  
772 irrigations on intraocular pressure. *Int Forum Allergy Rhinol.* 2013 Sep;3(9):704-7.
- 773
- 774 10. Rudmik L, Soler ZM, Orlandi RR, Stewart MG, Bhattacharyya N, et al. Early postoperative  
775 care following endoscopic sinus surgery: an evidence-based review with recommendations. *Int*  
776 *Forum Allergy Rhinol* 2011;1:417–430.
- 777
