# Supplementary material
Source: PubMed Central journal article supplement (PMC7934078)
Supplement: jamaotolaryngolheadnecksurg-e210011-s002.pdf [file jamaotolaryngolheadnecksurg-e210011-s002.pdf]

## Supplemental Online Content

Chang MT, Noel J, Ayoub NF, et al. Oral Corticosteroids Following Endoscopic Sinus Surgery for Chronic Rhinosinusitis Without Nasal Polyposis. *JAMA Otolaryngol Head Neck Surg*. Published online March 4, 2021. doi:10.1001/jamaoto.2021.0011

**eTable.** Multivariate regression analysis of medication usage association with SNOT-22 score

This supplemental material has been provided by the authors to give readers additional information about their work.

1 **Supplemental Table S1.** Multivariate regression analysis of medication usage association with  
2 SNOT-22 score.

3

|                        | Coefficient | 95% CI lower | 95% CI upper |
|------------------------|-------------|--------------|--------------|
| Corticosteroid - oral  | 6.29        | -5.17        | 17.76        |
| Corticosteroid - spray | -0.53       | -12.91       | 11.86        |
| Corticosteroid - rinse | -9.62       | -23.66       | 4.41         |
| Antibiotic - oral      | 27.62       | -15.93       | 71.18        |
| Antibiotic - rinse     | 6.26        | -8.17        | 20.70        |
| Antihistamine - spray  | -3.39       | -23.11       | 16.33        |
| Saline - rinse         | 5.71        | -37.01       | 48.51        |

4

5
