# Supplementary material
Source: PubMed Central journal article supplement (PMC7934078)
Supplement: jamaotolaryngolheadnecksurg-e210011-s003.pdf [file jamaotolaryngolheadnecksurg-e210011-s003.pdf]

## Data Sharing Statement

Chang. Oral Corticosteroids Following Endoscopic Sinus Surgery for Chronic Rhinosinusitis Without Nasal Polyposis. *JAMA Otolaryngol Head Neck Surg*. Published March 04, 2021.  
doi:10.1001/jamaoto.2021.0011

### Data

**Data available:** Yes

**Data types:** Deidentified participant data

#### How to access

**data:** <https://clinicaltrials.gov/ct2/show/NCT02748070?term=02748070&draw=2&rank=1>

**When available:** With publication

### Supporting Documents

**Document types:** Informed consent form

**How to access documents:** [hwangph@stanford.edu](mailto:hwangph@stanford.edu)

**When available:** With publication

### Additional Information

**Who can access the data:** researchers whose proposed use of the data has been approved

**Types of analyses:** for any purpose or for a specified purpose

**Mechanisms of data availability:** after approval of a proposal
